# Supplementary material
Source: HighWire-hosted journal article supplement (https://www.cmajopen.ca/highwire/filestream/81269/field_highwire_adjunct_files/0/2019-0007-1-at.pdf)

Appendix 1 (as supplied by the authors)

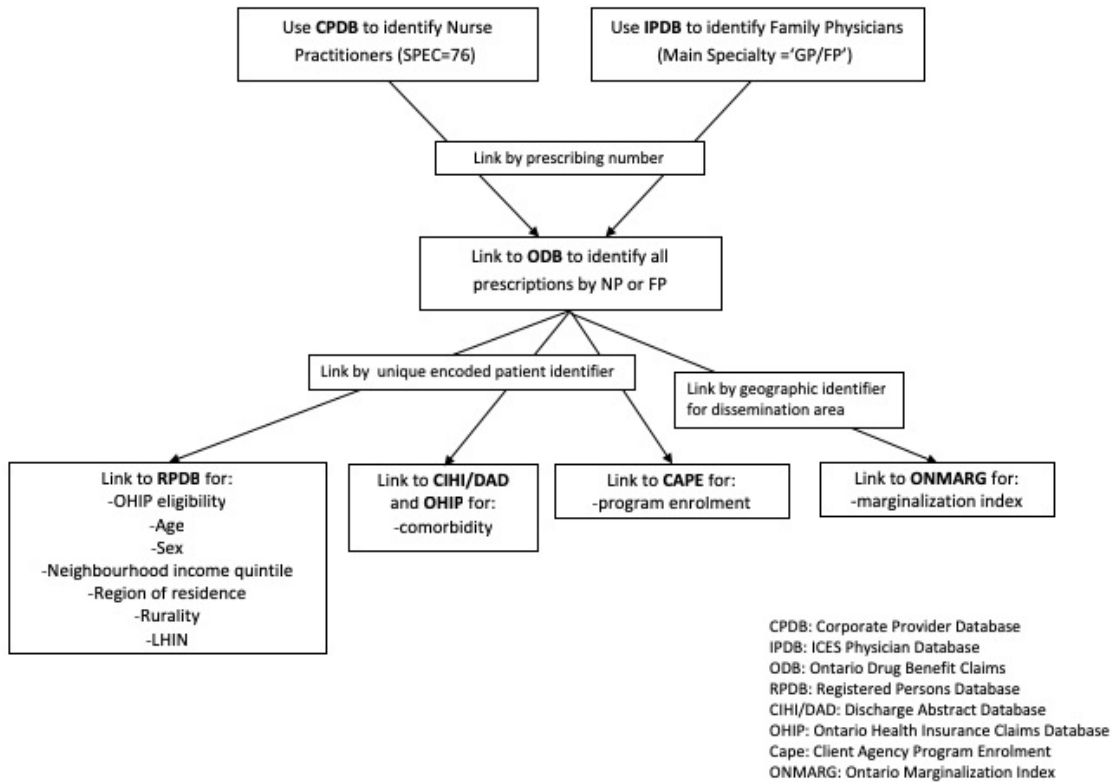

Supplement: 2019-0007-1-at.pdf [file 2019-0007-1-at.pdf]
